# Supplementary material for: Implementation of electrochemical, optical and denuder-based sensors and sampling techniques on UAV for volcanic gas measurements: examples from Masaya, Turrialba and Stromboli volcanoes
Source: Copernicus journal article supplement (doi:10.5194/amt-11-2441-2018), 2018-04-26
Supplement: Supplementary file 4 [file amt-11-2441-2018-supplement.zip]

```
// INCLUDES

#include <Wire.h>
#include <Adafruit_MotorShield.h>
#include "utility/Adafruit_MS_PWMServoDriver.h"
#include "RTCLib.h"
#include <SD.h>

// INSTANCES

File Data; //Logdatei
RTC_DS1307 RTC;

// Create the motor shield object with the default I2C address
Adafruit_MotorShield AFMS = Adafruit_MotorShield();
// Or, create it with a different I2C address (say for stacking)
// Adafruit_MotorShield AFMS = Adafruit_MotorShield(0x61);

// Select which 'port' M1, M2, M3 or M4. In this case, M1
Adafruit_DCMotor *myMotor = AFMS.getMotor(1);
// You can also make another motor on port M2
Adafruit_DCMotor *myOtherMotor = AFMS.getMotor(2);

// VARIABLES

//float S02;
char daysOfTheWeek[7][12] = {"Sunday", "Monday", "Tuesday", "Wednesday",
    "Thursday", "Friday", "Saturday"};
long startTime = 0;
//bool error = 0; //log in case of initialization error

const int analogInPin_Flow = A0; // Analog input pin that the flow sensor is
    attached to
int Flow_sensorValue = 0;

const int analogInPin_S02 = A2;
int S02_sensorValue = 0;

int outputValueFlow = 0;
int outputValueS02 = 0;

const int analogInPin_Voltage = A3;
int halfVoltageValue = 0;
int VoltageValue = 0;

int val1;
int val2;
int val3;
int val4;

// define the used relais
// declare constants LOW or 0 is on and HIGH or 1 is off
```

```

#define HEADER "Date\time\tt[ms]\tSO2[ppm]\tSO2out\tFlow\tPumpSpeed\tD1\tD2\tD3
\tD4\tVoltage"

#define RELAY_ON 0
#define RELAY_OFF 1

#define D1 3 //green wire
#define D2 4 //yellow wire
#define D3 5 //brown wire
#define D4 6 //orange wire

#define rcpin1 2 // remote control SA
#define rcpin2 7 // remote control SB
#define rcpin3 8 // remote control SC

#define SO2out 9 //output for remote control SO2 sensor value transimtion

//INITIALIZATIONS

void setup () {

    digitalWrite(D1, RELAY_OFF);
    digitalWrite(D2, RELAY_OFF);
    digitalWrite(D3, RELAY_OFF);
    digitalWrite(D4, RELAY_OFF);

    pinMode(rcpin1, INPUT);
    pinMode(rcpin2, INPUT);
    pinMode(rcpin3, INPUT);
    //pinMode(rcpin4, INPUT);

    pinMode(D1, OUTPUT);
    pinMode(D2, OUTPUT);
    pinMode(D3, OUTPUT);
    pinMode(D4, OUTPUT);

    pinMode(SO2out, OUTPUT);

    analogReference(INTERNAL); //internal reference voltage set to 1,1V

    Serial.begin(9600); //Initilization
    // Wire.begin();

    Serial.println("Start System");

    if(!SD.begin(10)){ //Initilization of SD card; in case no SD card is inserted "0"
        will be logged
        Serial.print("SD-Card missing!");
    }
}

```

---

```

if (! RTC.begin()) {
  Serial.println("Couldn't find RTC");
}

if (! RTC.isrunning()) {
  Serial.println("RTC is NOT running!");

  // following line sets the RTC to the date & time this sketch was compiled
  // RTC.adjust(DateTime(F(__DATE__), F(__TIME__)));
}

//AFMS.begin(); // create with the default frequency 1.6KHz
AFMS.begin(1); // OR with a different frequency, say 1KHz

//Set the speed to start, from 0 (off) to 255 (max speed)
myMotor->setSpeed(0);
myMotor->run(RELEASE); //release = off

myOtherMotor->setSpeed(255);
myOtherMotor->run(FORWARD); //release = off

Serial.println(HEADER); //print of header line

Data = SD.open("Data.txt", FILE_WRITE); //creates txt file on sd card for data
log
Data.println(HEADER); //prints header line into txt file
Data.close();

delay(1000);

}

void loop () {

  startTime = millis(); //save start time

  if(Serial.available() > 19 && Serial.read() == 't') setRTCFromSerial(); //Set
  RTC by PC using SetRTC.bat
  while((millis()-startTime)<500); //Set delay to GPS time in case there is a
  difference

  SO2_sensorValue = analogRead(analogInPin_SO2);

  outputValueSO2 = map(SO2_sensorValue, 0, 60, 0, 255);
  analogWrite(SO2out, outputValueSO2);

  Flow_sensorValue = analogRead(analogInPin_Flow);
  //Serial.print(digitalRead(D1));

  halfVoltageValue = analogRead(analogInPin_Voltage);
  VoltageValue = halfVoltageValue*2;

  // Denuder Loops

  // 1. loop for rc SA

```

---

```

        //Serial.println(pulseIn(rcpin1, LOW));
        val1 = pulseIn(rcpin1, INPUT);
        if ((val1 > 13500))
        {
            digitalWrite(D1, RELAY_ON);
        }
        else {
            digitalWrite(D1, RELAY_OFF);
        }

// 2. loop for rc SB
//Serial.println(pulseIn(rcpin2, LOW));
val2 = pulseIn(rcpin2, INPUT);
if ((val2 > 13500))
{
    digitalWrite(D2, RELAY_ON);
}
else {
    digitalWrite(D2, RELAY_OFF);
}

// 3. loop for rc SC
// Serial.println(pulseIn(rcpin3, LOW));
val3 = pulseIn(rcpin3, INPUT);
if ((val3 > 13500))
{
    digitalWrite(D3, RELAY_ON);
}
else {
    digitalWrite(D3, RELAY_OFF);
}

//Using tubing D4 as a direct line to the SO2 sensor in case no denuder sampling is
done

if ((val3 > 13200)&&
    (val1 < 13500)&&
    (val2 < 13500)&&
    (val3 < 13500))
{
    digitalWrite(D4, RELAY_ON);
}
else {
    digitalWrite(D4, RELAY_OFF);
}

if ((val1 > 13500)||
    (val2 > 13500)||
    (val3 > 13200))
{

```

---

```

    outputValueFlow = map(Flow_sensorValue, 175, 475, 190, 170);
    myMotor->setSpeed(180);
    myMotor->run(FORWARD);

}
else {
    myMotor->run(RELEASE);
    //myMotor->setSpeed(200);
    //myMotor->run(FORWARD);
}

    printDataToSD(); //print to sd card
    //printDataToSerial(); //send to serial port in order to debug
}

//PROCEDURE FOR SD LOGGING
void printDataToSD(){

    Data = SD.open("Data.txt", FILE_WRITE);
    DateTime now = RTC.now();

    Data.print(now.year(), DEC);
    Data.print('/');
    Data.print(now.month(), DEC);
    Data.print('/');
    Data.print(now.day(), DEC);
    Data.print(" ");
    //Data.print(daysOfTheWeek[now.dayOfTheWeek()]);
    Data.print(now.hour(), DEC);
    Data.print(':');
    Data.print(now.minute(), DEC);
    Data.print(':');
    Data.print(now.second(), DEC);
    Data.print(" ");
    Data.print(startTime);
    Data.print(" ");
    //Data.print("Flow_sensor = ");

    //Data.print("SO2_sensor = ");
    Data.print(SO2_sensorValue);
    Data.print(" ");
    Data.print(outputValueSO2);
    Data.print(" ");

    Data.print(Flow_sensorValue);
    Data.print(" ");
    Data.print(outputValueFlow);
    Data.print(" ");

    Data.print(digitalRead(D1));
    Data.print(" ");

```

---

```

    Data.print(digitalRead(D2));
    Data.print(" ");
    Data.print(digitalRead(D3));
    Data.print(" ");
    Data.print(digitalRead(D4));
    Data.print(" ");
    Data.println(VoltageValue);

    Data.close();
}

//PROCEDURE FOR SD PINTING
void printDataToSerial(){

    Data = SD.open("Data.txt", FILE_WRITE);
    DateTime now = RTC.now();

    Serial.print(now.year(), DEC);
    Serial.print('/');
    Serial.print(now.month(), DEC);
    Serial.print('/');
    Serial.print(now.day(), DEC);
    Serial.print(" ");
    //Serial.print(daysOfTheWeek[now.dayOfTheWeek()]);
    Serial.print(now.hour(), DEC);
    Serial.print(':');
    Serial.print(now.minute(), DEC);
    Serial.print(':');
    Serial.print(now.second(), DEC);
    Serial.print(" ");
    Serial.print(startTime);
    Serial.print(" ");
    //Serial.print("Flow_sensor = ");

    Serial.print(SO2_sensorValue);
    Serial.print(" ");
    Serial.print(outputValueSO2);
    Serial.print(" ");

    Serial.print(Flow_sensorValue);
    Serial.print(" ");
    Serial.print(outputValueFlow);
    Serial.print(" ");

    Serial.print(" ");
    Serial.print(digitalRead(D1));
    Serial.print(" ");
    Serial.print(digitalRead(D2));
    Serial.print(" ");
    Serial.print(digitalRead(D3));
    Serial.print(" ");
    Serial.print(digitalRead(D4));
    Serial.print(" ");
    Serial.println(VoltageValue);

```

```
}
```

```
    //RESET RTC WITH EXTERNAL PC
```

```
void setRTCFromSerial(){  
    uint8_t tag = Serial.parseInt();  
    uint8_t monat = Serial.parseInt();  
    uint16_t jahr = Serial.parseInt();  
    uint8_t stunden = Serial.parseInt();  
    uint8_t minuten = Serial.parseInt();  
    uint8_t sekunden = Serial.parseInt();  
    while(Serial.available()) Serial.read();  
    RTC.adjust(DateTime(jahr, monat, tag, stunden, minuten, sekunden));  
}
```
