# Supplementary material for: Implementation of electrochemical, optical and denuder-based sensors and sampling techniques on UAV for volcanic gas measurements: examples from Masaya, Turrialba and Stromboli volcanoes
Source: Copernicus journal article supplement (doi:10.5194/amt-11-2441-2018), 2018-04-26
Supplement: Supplementary file 5 [file amt-11-2441-2018-supplement.zip]

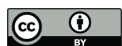

## *Supplement of*

# **Implementation of electrochemical, optical and denuder-based sensors and sampling techniques on UAV for volcanic gas measurements: examples from Masaya, Turrialba and Stromboli volcanoes**

**Julian Rüdiger et al.**

*Correspondence to:* Julian Rüdiger ([j.ruediger@uni-mainz.de](mailto:j.ruediger@uni-mainz.de)) and Thorsten Hoffmann ([hoffmant@uni-mainz.de](mailto:hoffmant@uni-mainz.de))

- [amt-11-2441-2018-supplement-title-page.pdf](#)
- [BlackBoxCode.ino](#)
- [BlackBoxCode\\_pdf.pdf](#)
- [Rüdiger et al.\\_amt-2017-335\\_supplementary material \(revised\).pdf](#)
- [SunkistCode.ino](#)
- [SunkistCode\\_pdf.pdf](#)
- [Wiring-Black\\_Box.pdf](#)

The copyright of individual parts of the supplement might differ from the CC BY 4.0 License.
