# Supplementary figures and images for: Implementation of electrochemical, optical and denuder-based sensors and sampling techniques on UAV for volcanic gas measurements: examples from Masaya, Turrialba and Stromboli volcanoes
Source: Copernicus journal article supplement (doi:10.5194/amt-11-2441-2018), 2018-04-26

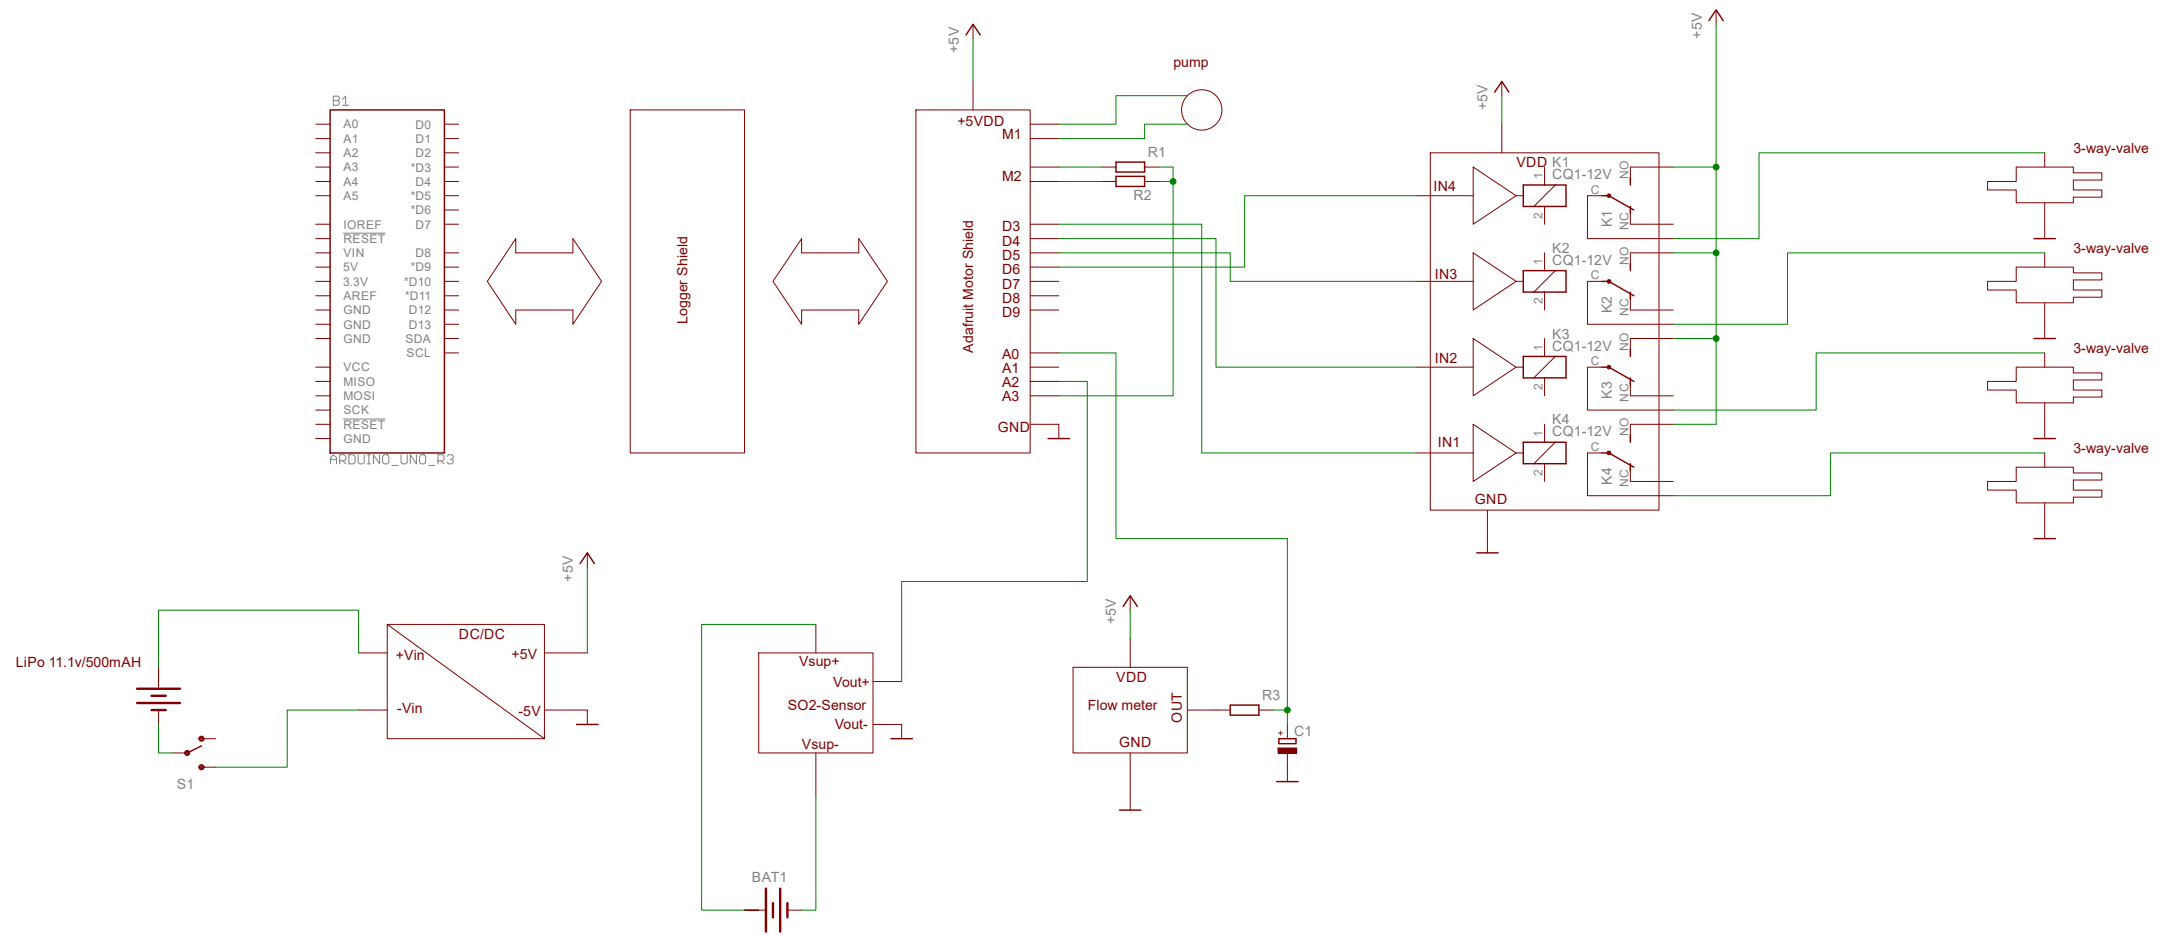

Supplement: Supplementary file 3 [file amt-11-2441-2018-supplement.zip]
